# Supplementary material for: The Biological Properties of the Essential Oil from the Jordan Accession of Phagnalon sinaicum Bornm. & Kneuck.
Source: MDPI journal article supplement (doi:10.3390/plants12234007), 2023-11-28
Supplement: s1 [file s1]

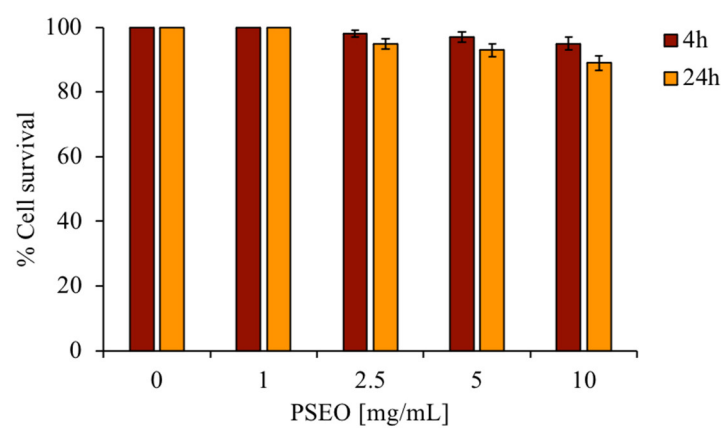

**Figure S1:** Determination of the cytotoxic activity of **PSEO**. The image shows the percentage of cell survival of the HaCat cell line treated with different concentrations (x-axis) of EO for 4 and 24 h. Cell survival percentage is shown on the y-axis. The tests were performed in three independent experiments. Standard deviations are always less than 5%.
